# Supplementary material for: The Combination of Citrus Rootstock and Scion Cultivar Influences Trioza erytreae (Hemiptera: Triozidae) Survival, Preference Choice and Oviposition
Source: MDPI journal article supplement (doi:10.3390/insects15050363), 2024-05-16
Supplement: s1 [file s1]

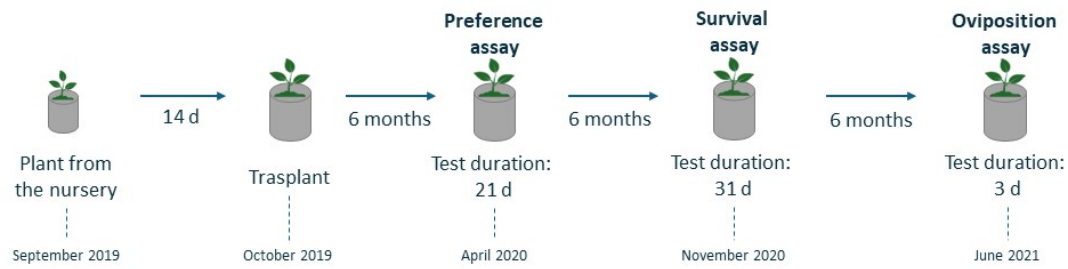

**Figure S1.** Scheme of the use of each citrus combination in chronological order of experiments with *T. erythrae*.

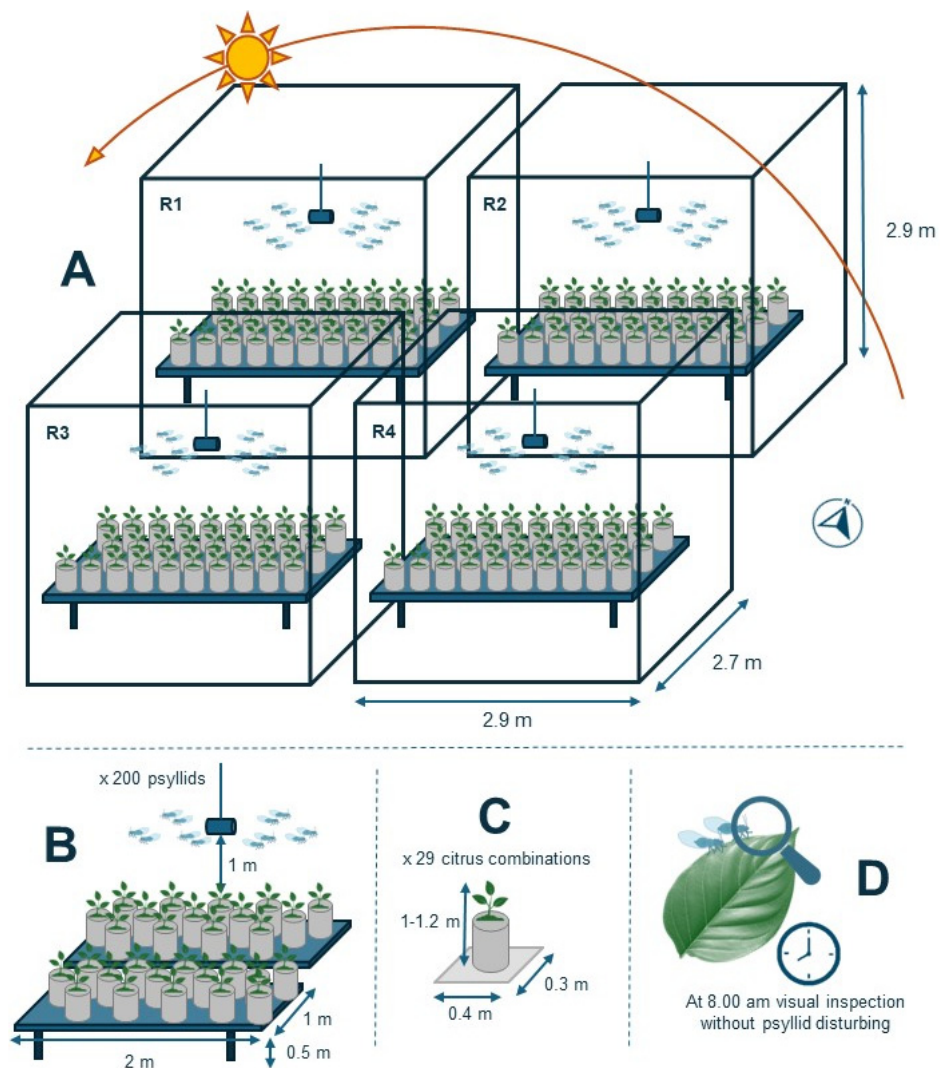

**Figure S2.** Scheme of *T. erythrae* settlement preference assay. A, localization of replicates (4 walk-in entomological cages) used in this experiment; B, details of psyllids release; C, dimension and occupied area per plant; and D, detail of psyllid monitoring.

**Table S1.** Kaplan-Meier estimate for the ‘Ortanique’ cultivar.

| Rootstock * | Time<br>(days) | Dead<br>(n) | Alive<br>(n) | Estimated probability |       | Probability of survivors at<br>the end of time |
|-------------|----------------|-------------|--------------|-----------------------|-------|------------------------------------------------|
|             |                |             |              | Survival              | Death |                                                |
| CC          | 1              | 7           | 25           | 0.964                 | 0.036 | 0.964                                          |
|             | 3              | 13          | 19           | 0.885                 | 0.115 | 0.853                                          |
|             | 7              | 15          | 17           | 0.782                 | 0.218 | 0.667                                          |
|             | 17             | 29          | 3            | 0.545                 | 0.455 | 0.364                                          |
|             | 24             | 32          | 0            | 0.273                 | 0.727 | 0.099                                          |
|             | 31             | 32          | 0            | 0.000                 | 1.000 | 0.000                                          |
| CM          | 1              | 6           | 26           | 0.969                 | 0.031 | 0.969                                          |
|             | 3              | 9           | 23           | 0.914                 | 0.086 | 0.886                                          |
|             | 7              | 11          | 21           | 0.836                 | 0.164 | 0.740                                          |
|             | 17             | 26          | 6            | 0.609                 | 0.391 | 0.451                                          |
|             | 24             | 31          | 1            | 0.314                 | 0.686 | 0.142                                          |
|             | 31             | 31          | 1            | 0.010                 | 0.990 | 0.001                                          |
| FA5         | 1              | 4           | 28           | 0.979                 | 0.021 | 0.979                                          |
|             | 3              | 8           | 24           | 0.930                 | 0.070 | 0.911                                          |
|             | 7              | 10          | 22           | 0.858                 | 0.142 | 0.781                                          |
|             | 17             | 26          | 6            | 0.625                 | 0.375 | 0.488                                          |
|             | 24             | 31          | 1            | 0.322                 | 0.678 | 0.157                                          |
|             | 31             | 31          | 1            | 0.010                 | 0.990 | 0.002                                          |
| FA517       | 1              | 13          | 19           | 0.932                 | 0.068 | 0.932                                          |
|             | 3              | 15          | 17           | 0.845                 | 0.155 | 0.788                                          |
|             | 7              | 20          | 12           | 0.713                 | 0.287 | 0.562                                          |
|             | 17             | 29          | 3            | 0.498                 | 0.502 | 0.279                                          |
|             | 24             | 32          | 0            | 0.249                 | 0.751 | 0.069                                          |
|             | 31             | 32          | 0            | 0.000                 | 1.000 | 0.000                                          |
| FD          | 1              | 9           | 23           | 0.953                 | 0.047 | 0.953                                          |
|             | 3              | 12          | 20           | 0.882                 | 0.118 | 0.840                                          |
|             | 7              | 13          | 19           | 0.792                 | 0.208 | 0.666                                          |
|             | 17             | 23          | 9            | 0.602                 | 0.398 | 0.401                                          |
|             | 24             | 27          | 5            | 0.348                 | 0.652 | 0.140                                          |
|             | 31             | 28          | 4            | 0.044                 | 0.956 | 0.006                                          |

\*Rootstock: FD, Flying Dragon; CC, Carrizo citrange; FA5, Forner-Alcaide no. 5; FA517, Forner-Alcaide no. 517; CM, *Citrus macrophylla*

**Table S2.** Kaplan-Meier estimate for the cultivars: ‘Clemenules’, ‘Navelina’, ‘Valencia Late’ and ‘Fino 49’.

| Cultivars       | Root-stock* | Time (days) | Dead (n) | Alive (n) | Estimated probability |       | Probability of survivors at the end of time |
|-----------------|-------------|-------------|----------|-----------|-----------------------|-------|---------------------------------------------|
|                 |             |             |          |           | Survival              | Death |                                             |
| ‘Clemenules’    | CC          | 1           | 9        | 23        | 0.953                 | 0.047 | 0.953                                       |
|                 |             | 3           | 9        | 23        | 0.900                 | 0.100 | 0.857                                       |
|                 |             | 7           | 9        | 23        | 0.836                 | 0.164 | 0.717                                       |
|                 |             | 17          | 27       | 5         | 0.601                 | 0.399 | 0.431                                       |
|                 |             | 24          | 32       | 0         | 0.301                 | 0.699 | 0.130                                       |
|                 |             | 31          | 32       | 0         | 0.000                 | 1.000 | 0.000                                       |
|                 | CM          | 1           | 10       | 22        | 0.948                 | 0.052 | 0.948                                       |
|                 |             | 3           | 11       | 21        | 0.883                 | 0.117 | 0.837                                       |
|                 |             | 7           | 13       | 19        | 0.793                 | 0.207 | 0.664                                       |
|                 |             | 17          | 31       | 1         | 0.537                 | 0.463 | 0.356                                       |
|                 |             | 24          | 32       | 0         | 0.268                 | 0.732 | 0.096                                       |
|                 |             | 31          | 32       | 0         | 0.000                 | 1.000 | 0.000                                       |
| ‘Navelina’      | CC          | 1           | 8        | 24        | 0.958                 | 0.042 | 0.958                                       |
|                 |             | 3           | 8        | 24        | 0.910                 | 0.090 | 0.872                                       |
|                 |             | 7           | 8        | 24        | 0.854                 | 0.146 | 0.745                                       |
|                 |             | 17          | 27       | 5         | 0.613                 | 0.387 | 0.457                                       |
|                 |             | 24          | 31       | 1         | 0.316                 | 0.684 | 0.145                                       |
|                 |             | 31          | 32       | 0         | 0.000                 | 1.000 | 0.000                                       |
|                 | CM          | 1           | 7        | 25        | 0.964                 | 0.036 | 0.964                                       |
|                 |             | 3           | 10       | 22        | 0.903                 | 0.097 | 0.870                                       |
|                 |             | 7           | 11       | 21        | 0.826                 | 0.174 | 0.719                                       |
|                 |             | 17          | 20       | 12        | 0.654                 | 0.346 | 0.470                                       |
|                 |             | 24          | 23       | 9         | 0.419                 | 0.581 | 0.197                                       |
|                 |             | 31          | 24       | 8         | 0.105                 | 0.895 | 0.021                                       |
| ‘Valencia Late’ | CC          | 1           | 14       | 18        | 0.927                 | 0.073 | 0.927                                       |
|                 |             | 3           | 14       | 18        | 0.846                 | 0.154 | 0.784                                       |
|                 |             | 7           | 21       | 11        | 0.707                 | 0.293 | 0.555                                       |
|                 |             | 17          | 32       | 0         | 0.471                 | 0.529 | 0.261                                       |
|                 |             | 24          | 32       | 0         | 0.236                 | 0.764 | 0.062                                       |
|                 |             | 31          | 32       | 0         | 0.000                 | 1.000 | 0.000                                       |
|                 | CM          | 1           | 7        | 25        | 0.964                 | 0.036 | 0.964                                       |
|                 |             | 3           | 8        | 24        | 0.915                 | 0.085 | 0.882                                       |
|                 |             | 7           | 10       | 22        | 0.844                 | 0.156 | 0.744                                       |
|                 |             | 17          | 27       | 5         | 0.607                 | 0.393 | 0.451                                       |
|                 |             | 24          | 30       | 2         | 0.322                 | 0.678 | 0.145                                       |
|                 |             | 31          | 30       | 2         | 0.020                 | 0.980 | 0.003                                       |
| ‘Fino 49’       | CC          | 1           | 6        | 26        | 0.969                 | 0.031 | 0.969                                       |
|                 |             | 3           | 10       | 22        | 0.908                 | 0.092 | 0.880                                       |
|                 |             | 7           | 12       | 20        | 0.823                 | 0.177 | 0.724                                       |
|                 |             | 17          | 24       | 8         | 0.617                 | 0.383 | 0.447                                       |
|                 |             | 24          | 31       | 1         | 0.318                 | 0.682 | 0.142                                       |
|                 |             | 31          | 31       | 1         | 0.010                 | 0.990 | 0.001                                       |
|                 | CM          | 1           | 9        | 23        | 0.953                 | 0.047 | 0.953                                       |
|                 |             | 3           | 11       | 21        | 0.888                 | 0.112 | 0.846                                       |
|                 |             | 7           | 15       | 17        | 0.784                 | 0.216 | 0.663                                       |
|                 |             | 17          | 22       | 10        | 0.604                 | 0.396 | 0.400                                       |
|                 |             | 24          | 27       | 5         | 0.349                 | 0.651 | 0.140                                       |
|                 |             | 31          | 28       | 4         | 0.044                 | 0.956 | 0.006                                       |

\*Rootstock: CC, Carrizo citrange; CM, *Citrus macrophylla*.

**Table S3. Number of individuals of *T. erytreae* (mean±SE) settled per citrus combination during six monitoring times (1, 3, 7, 14 and 21 days).**

| Scion<br>cultivar | Rootstock* | Days from psyllids release |         |         |         |         |
|-------------------|------------|----------------------------|---------|---------|---------|---------|
|                   |            | Day 1                      | Day 3   | Day 7   | Day 14  | Day 21  |
| 'Clemenules'      | CC         | 4.0±0.4                    | 5.0±1.1 | 1.8±0.8 | 0.0±0.0 | 0.3±0.3 |
|                   | CL         | 2.0±0.9                    | 3.0±0.9 | 1.0±0.6 | 1.8±0.3 | 0.3±0.3 |
|                   | CM         | 2.5±1.0                    | 1.8±0.9 | 1.5±0.9 | 1.0±1.0 | 0.3±0.3 |
|                   | FA5        | 1.8±0.5                    | 1.8±0.9 | 1.8±1.0 | 1.0±0.4 | 0.5±0.5 |
|                   | FA517      | 0.0±0.0                    | 0.3±0.3 | 1.5±1.2 | 0.3±0.3 | 0.0±0.0 |
|                   | FD         | 2.0±0.4                    | 1.5±0.5 | 0.5±0.3 | 1.8±0.3 | 1.3±0.5 |
| 'Fino 49'         | CC         | 0.3±0.3                    | 0.3±0.3 | 0.3±0.3 | 0.5±0.3 | 0.0±0.0 |
|                   | CM         | 2.5±0.9                    | 2.3±0.9 | 1.3±0.8 | 0.3±0.3 | 0.5±0.5 |
|                   | FA5        | 3.0±0.6                    | 2.3±1.1 | 1.3±0.9 | 0.0±0.0 | 0.3±0.3 |
|                   | FD         | 2.8±1.3                    | 3.0±1.3 | 2.3±0.9 | 1.0±0.6 | 0.3±0.3 |
| 'Navelina'        | CC         | 4.3±1.7                    | 4.3±2.0 | 2.8±1.1 | 2.0±1.1 | 1.3±0.5 |
|                   | CLE        | 2.8±0.6                    | 3.0±0.7 | 2.3±1.6 | 1.3±0.9 | 0.3±0.3 |
|                   | CM         | 2.3±0.6                    | 2.0±0.7 | 0.5±0.5 | 1.3±0.8 | 1.0±1.0 |
|                   | FA5        | 2.8±1.3                    | 3.3±1.7 | 1.3±0.9 | 1.0±0.7 | 0.5±0.5 |
|                   | FA517      | 1.3±0.6                    | 2.3±1.7 | 1.8±1.0 | 2.0±0.8 | 0.3±0.3 |
| 'Ortanique'       | CC         | 5.3±2.3                    | 3.5±1.7 | 0.8±0.3 | 0.3±0.3 | 0.5±0.5 |
|                   | CM         | 4.0±2.0                    | 4.0±2.3 | 2.0±1.2 | 0.0±0.0 | 0.0±0.0 |
|                   | FA5        | 2.3±0.8                    | 0.8±0.5 | 1.8±0.8 | 1.0±0.7 | 0.8±0.8 |
|                   | FA517      | 4.0±2.3                    | 4.0±1.2 | 4.3±1.1 | 2.5±1.3 | 1.0±0.6 |
|                   | FD         | 3.0±1.2                    | 2.0±0.8 | 3.8±2.4 | 3.5±2.9 | 3.3±2.9 |
| 'Star Ruby'       | CC         | 1.8±1.1                    | 2.3±1.6 | 0.5±0.3 | 0.3±0.3 | 0.0±0.0 |
|                   | CLE        | 3.3±2.9                    | 2.0±1.7 | 0.8±0.5 | 0.5±0.5 | 1.0±0.7 |
|                   | FA5        | 1.8±0.8                    | 3.3±1.5 | 1.5±1.2 | 1.0±0.6 | 0.5±0.3 |
|                   | FD         | 2.0±0.4                    | 2.0±1.4 | 1.8±0.9 | 0.8±0.8 | 0.3±0.3 |
| 'Valencia Late'   | CC         | 1.8±1.0                    | 1.5±1.2 | 0.8±0.5 | 0.0±0.0 | 0.3±0.3 |
|                   | CLE        | 1.5±1.5                    | 1.0±0.7 | 1.8±0.9 | 1.0±0.7 | 0.3±0.3 |
|                   | CM         | 2.8±1.8                    | 2.5±1.9 | 0.3±0.3 | 0.8±0.5 | 0.0±0.0 |
|                   | FA5        | 1.8±0.5                    | 1.5±0.9 | 1.3±0.6 | 0.8±0.8 | 0.5±0.3 |
|                   | FD         | 1.3±0.5                    | 0.8±0.5 | 0.8±0.8 | 0.8±0.8 | 2.3±1.3 |

\*Rootstock: FD: Flying Dragon; CL: Cleopatra mandarin; CC: Carrizo citrange; FA5: Forner-Alcaide no. 5; FA517: Forner-Alcaide no. 517; CM: Citrus macrophylla.
